# Supplementary material for: Oral Habits during the Lockdown from the SARS-CoV-2 Pandemic in the Romanian Population
Source: MDPI journal article supplement (doi:10.3390/medicina58030387), 2022-03-05
Supplement: s1 [file s1]

**Table S1.** Questionnaire on behavioural risk factors for oral health on Quarantine during Covid-19 pandemic

| Question | Parameter                   | Questions, Response Scale and Romanian Translations ( <i>italic</i> )                              |                                                                                                                                                        |
|----------|-----------------------------|----------------------------------------------------------------------------------------------------|--------------------------------------------------------------------------------------------------------------------------------------------------------|
| Q1       | Oral health self-assessment | How would you describe your current oral health?                                                   | <i>Cum ați descrie starea dumneavoastră de sănătate orală?</i>                                                                                         |
|          |                             | 1. Excellent<br>2. Very good<br>3. Good<br>4. Satisfactory<br>5. Very poor<br>6. I don't know      | 1. <i>Excelentă</i><br>2. <i>Foarte bună</i><br>3. <i>Bună</i><br>4. <i>Satisfăcătoare</i><br>5. <i>Foarte slabă</i><br>6. <i>Nu știu</i>              |
| Q2       | Toothbrushing Frequency     | How often did you brush your teeth?<br>a) During lockdown<br>b) Before lockdown                    | <i>Cât de des v-ați periat dinții?</i><br>a) <i>Pe timpul carantinei</i><br>b) <i>Înainte de carantină</i>                                             |
|          |                             | 1. More than twice a day<br>2. Twice a day<br>3. Once a day<br>4. Several times a week<br>5. Never | 1. <i>Mai mult de 2 ori pe zi</i><br>2. <i>De 2 ori pe zi</i><br>3. <i>O dată pe zi</i><br>4. <i>De câteva ori pe săptămână</i><br>5. <i>Niciodată</i> |
| Q3       | Toothbrushing Duration      | How long was the duration of toothbrushing?<br>a) During lockdown<br>b) Before lockdown            | <i>Cât timp ați acordat periajului dentar?</i><br><br>a) <i>Pe timpul carantinei</i><br>b) <i>Înainte de carantină</i>                                 |
|          |                             | 1. 30 seconds<br>2. 1 minute<br>3. 2 minutes<br>4. More than 2 minutes                             | 1. <i>30 secunde</i><br>2. <i>1 minut</i><br>3. <i>2 minute</i><br>4. <i>Mai mult de 2 minute</i>                                                      |
| Q4       | Toothbrush Type             | What type of toothbrush did you use?<br>a) During lockdown<br>b) Before lockdown                   | <i>Ce tip de periuță ați folosit?</i><br>a) <i>Pe timpul carantinei</i><br>b) <i>Înainte de carantină</i>                                              |
|          |                             | 1. Manual<br>2. Powered<br>3. Both manual and powered                                              | 1. <i>Manuală</i><br>2. <i>Electrică</i><br>3. <i>Atât manual cât și electrică</i>                                                                     |
| Q5       | Use of dental floss         | Did you use dental floss?<br>a) During lockdown<br>b) Before lockdown                              | <i>Ați utilizat ața dentară?</i><br>a) <i>Pe timpul carantinei</i><br>b) <i>Înainte de carantină</i>                                                   |
|          |                             | 1. Yes<br>2. No                                                                                    | 1. <i>Da</i><br>2. <i>Nu</i>                                                                                                                           |
| Q6       | Frequency of using dental   | Did you use daily the dental floss?<br>a) During lockdown<br>b) Before lockdown                    | <i>Ați utilizat zilnic ața dentară?</i><br>a) <i>Pe timpul carantinei</i><br>b) <i>Înainte de carantină</i>                                            |

|    |                                                    |                                                                                                                                                                                                       |                                                                                                                                                                                    |
|----|----------------------------------------------------|-------------------------------------------------------------------------------------------------------------------------------------------------------------------------------------------------------|------------------------------------------------------------------------------------------------------------------------------------------------------------------------------------|
|    | floss                                              | 1. Yes<br>2. No                                                                                                                                                                                       | 1. Da<br>2. Nu                                                                                                                                                                     |
| Q7 | Use of other secondary oral hygiene products       | What other secondary oral hygiene products did you use daily (apart from toothpaste and toothbrush, dental floss)?<br>a) During lockdown<br>b) Before lockdown                                        | <i>Ce alte produse pentru igienă orală ați utilizat zilnic (în afară de pastă, periuță și ață dentară)?</i><br>a) Pe timpul carantinei<br>b) Înainte de carantină                  |
|    |                                                    | 1. Mouthwash<br>2. Toothpicks<br>3. Interdental brushes<br>4. Oral irrigator                                                                                                                          | 1. Apă de gură<br>2. Scobitori<br>3. Periuțe interdentare<br>4. Duș bucal                                                                                                          |
| Q8 | Frequency of snacks per day                        | How many times a day did you eat snacks between the 3 main meals?<br>a) During lockdown<br>b) Before lockdown                                                                                         | <i>De câte ori pe zi luați gustări între cele 3 mese principale?</i><br>a) Pe timpul carantinei<br>b) Înainte de carantină                                                         |
|    |                                                    | 1. Never<br>2. 1-2 times<br>3. 3-4 times<br>4. More than 4 times                                                                                                                                      | 1. Deloc<br>2. 1-2 ori<br>3. 3-4 ori<br>4. Mai mult de 4 ori                                                                                                                       |
| Q9 | Type of pre-dominant snacks between the main meals | Your snacks between main meals were based mostly on:<br>a) During lockdown<br>b) Before lockdown                                                                                                      | <i>Gustările între mesele principale se bazează predominant pe:</i><br>a) Pe timpul carantinei<br>b) Înainte de carantină                                                          |
|    |                                                    | 1. Sweets<br>2. Fruits/vegetables<br>3. Starchy food (biscuits/pretzels)<br>4. Sandwich<br>5. Dairy products (yogurt/kefir)<br>6. Chips/nachos/popcorn<br>7. Various ( a wide-range of food products) | 1. Dulciuri<br>2. Fructe/legume<br>3. Făinoase (biscuiți/covrigei)<br>4. Sandwich<br>5. Lactate (iaurt/kefir)<br>6. Chipsuri/nachos/popcorn<br>7. Variat (o gamă largă de produse) |

| Question | Parameter                              | Questions, Response Scale and Romanian Translations ( <i>italic</i> )                                            |                                                                                                                                             |
|----------|----------------------------------------|------------------------------------------------------------------------------------------------------------------|---------------------------------------------------------------------------------------------------------------------------------------------|
| Q10      | Consumption of non-alcoholic beverages | Did you drink beverages?<br>a) During lockdown<br>b) Before lockdown                                             | <i>Ați consumat sucuri carbogazoase/îndulcite?</i><br><i>a) Pe timpul carantinei</i><br><i>b) Înainte de carantină</i>                      |
|          |                                        | 1. Several times a day<br>2. Once a day<br>3. Several times a week<br>4. Seldom<br>5. Never                      | <i>1. De câteva ori pe zi</i><br><i>2. O dată pe zi</i><br><i>3. De câteva ori pe săptămână</i><br><i>4. Rareori</i><br><i>5. Niciodată</i> |
| Q 11     | Smoking habit                          | Did you smoke?<br>a) During lockdown<br>b) Before lockdown                                                       | <i>Ați fumat?</i><br><i>a) Pe timpul carantinei</i><br><i>b) Înainte de carantină</i>                                                       |
|          |                                        | 1. Never<br>2. Occasional<br>3. 1-10 cigarettes/day<br>4. 11-20 cigarettes/day<br>5. More than 20 cigarettes/day | <i>1. Niciodată</i><br><i>2. Ocazional</i><br><i>3. 1-10 țigări/zi</i><br><i>4. 11-20 țigări/zi</i><br><i>5. Mai mult de 20 țigări/zi</i>   |
| Q12      | Working/studying place                 | During the lockdown you worked/studied:                                                                          | <i>Pe durata stării de urgență ați lucrat:</i>                                                                                              |
|          |                                        | 1. Not at all<br>2. From home<br>3. At the working place<br>4. Partly from home, partly at the working place     | <i>1. Deloc</i><br><i>2. De acasă</i><br><i>3. La locul de muncă</i><br><i>4. Parțial acasă, parțial la locul de muncă</i>                  |
| Q13      | Medical/non-medical group              | Do you work/study in the medical / dental field?                                                                 | <i>Profesați în domeniul medical/stomatologic?</i>                                                                                          |
|          |                                        | 1. Yes<br>2. No                                                                                                  | <i>1. Da</i><br><i>2. Nu</i>                                                                                                                |
| Q14      | Location during the lockdown           | During the lockdown, you lived:                                                                                  | <i>Pe durata stării de urgență ați locuit:</i>                                                                                              |
|          |                                        | 1. In Romania<br>2. In other country                                                                             | <i>1. În România</i><br><i>2. În altă țară</i>                                                                                              |
| Q15      | Studying field                         | In which university field do you study (open question restricted to students)                                    | <i>În ce domeniu studiați (întrebare deschisă adresată doar participanților studenți)</i>                                                   |
| Q16      | Age                                    | Age                                                                                                              | <i>Vârsta</i>                                                                                                                               |
| Q17      | Gender                                 | Sex                                                                                                              | <i>Sexul</i>                                                                                                                                |
|          |                                        | 1. Male<br>2. Female<br>3. I choose not to answer                                                                | <i>1. Masculin</i><br><i>2. Feminin</i><br><i>3. Aleg să nu răspund</i>                                                                     |
